# Supplementary material for: Leaf vs. Whole-Plant Biotic Attack: Does Vine Physiological Response Change?
Source: MDPI journal article supplement (doi:10.3390/w13101429), 2021-05-20
Supplement: s1 [file s1]

## Supplementary Materials

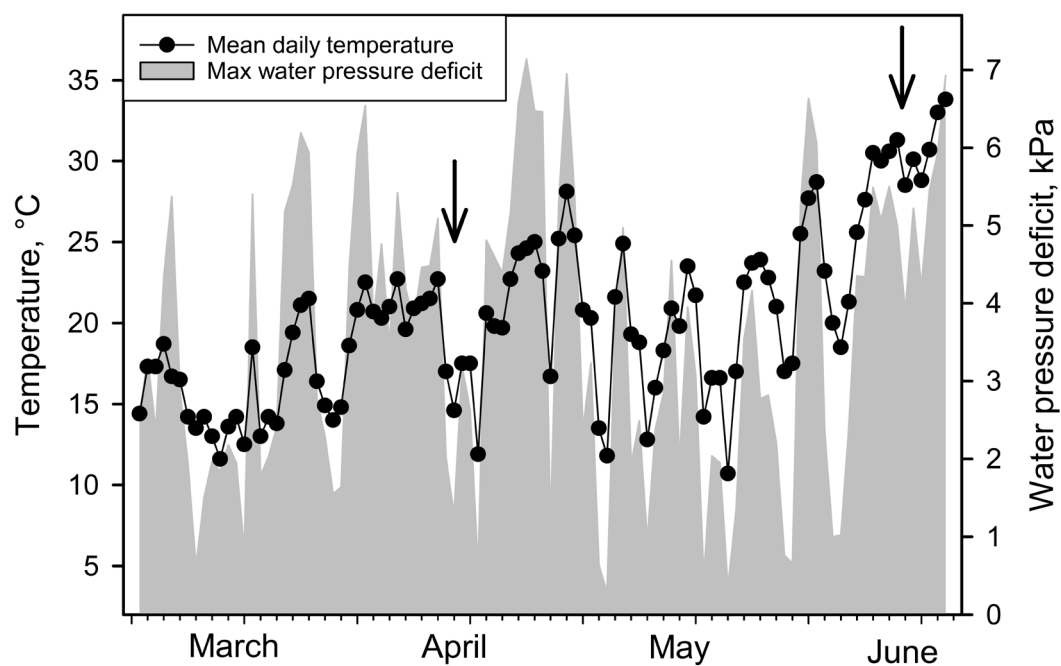

**Figure S1.** Microclimatic data recorded in the quarantine cage during the experimental period: average daily temperature (closed circles, left axis) and midday water pressure deficit (grey area, right axis). The two arrows indicate the inoculation and the final sampling day, respectively.

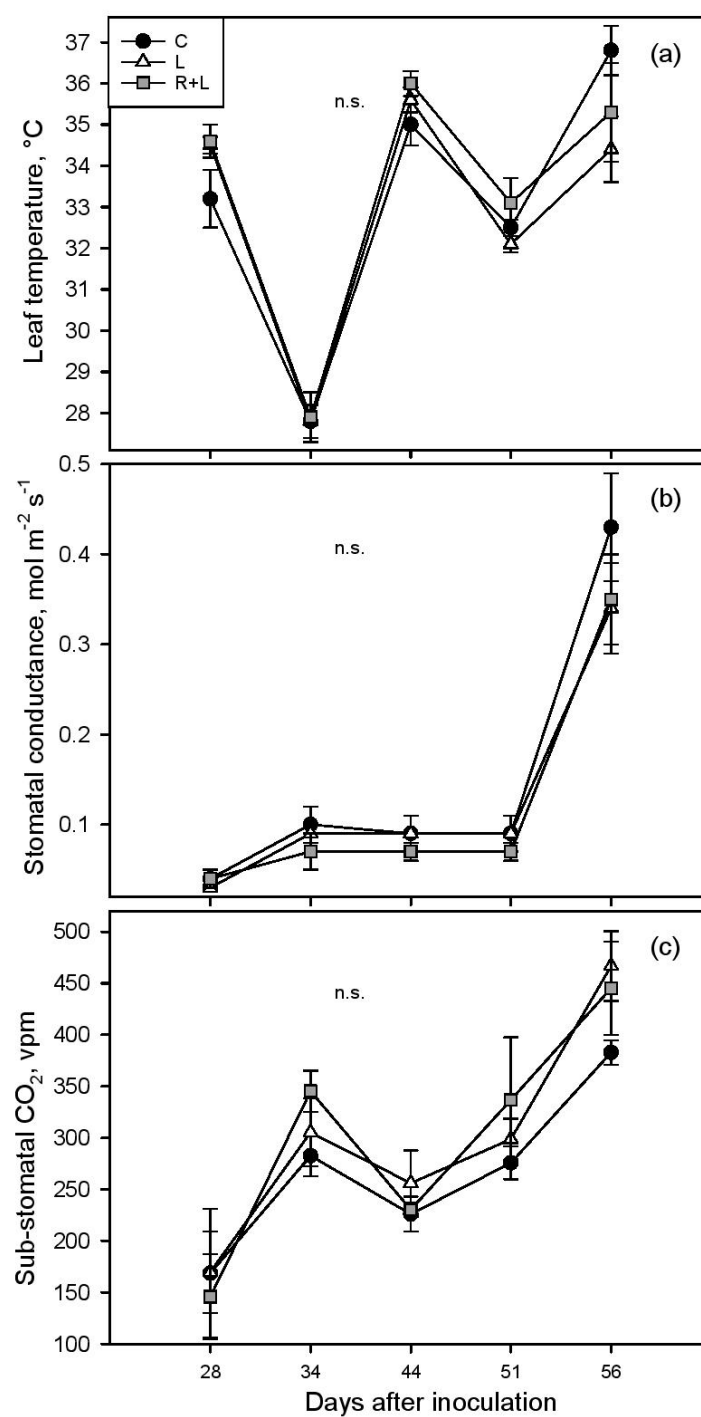

**Figure S2.** Leaf temperature ( $T_{\text{leaf}}$ ) (a), stomatal conductance to water vapour ( $g_s$ ) (b), sub-stomatal  $\text{CO}_2$  ( $C_i$ ) (c) as measured in control (C, closed circles), leaf infested (L, open triangles), and both root and leaf infested (R+L, grey squares) plants during the treatments application ( $n = 5-8$ ). n.s. indicates lack of statistically significant differences.
